# Supplementary material
Source: HighWire-hosted journal article supplement (http://cmajopen.ca/highwire/filestream/81277/field_highwire_adjunct_files/3/2019-0038-original-submission.pdf)
Supplement: 2019-0038-original-submission.pdf [file 2019-0038-original-submission.pdf]

1  
2  
3 1 **Title:**  
4  
5

6 2 The primary care and other health system use of home care patients: a retrospective cohort analysis  
7  
8

9 3 **Authors**  
10  
11

12 4 Aaron Jones, MSc<sup>1</sup>  
13

14 5 Susan E. Bronskill, PhD<sup>2,3</sup>  
15

16 6 Gina Agarwal, MBBS, PhD<sup>1,4</sup>  
17

18 7 Hsien Seow, PhD<sup>1,5</sup>  
19

20 8 David Feeny, PhD<sup>6</sup>  
21

22 9 Andrew P. Costa, PhD<sup>1,7</sup>  
23  
24  
25

26 10 **Author Affiliations**  
27  
28

29 11 <sup>1</sup>Department of Health Research Methods, Evidence, and Impact, McMaster University,  
30  
31  
32 Hamilton, Ontario, Canada.  
33

34 13 <sup>2</sup>ICES, Toronto, Ontario, Canada.  
35  
36  
37

38 14 <sup>3</sup>Institute of Health Policy, Management & Evaluation, Dalla Lana School of Public Health, University of  
39  
40  
41 Toronto  
42

43 16 <sup>4</sup>Department of Family Medicine, McMaster University, Hamilton, Ontario, Canada.  
44  
45

46 17 <sup>5</sup>Department of Oncology, McMaster University, Hamilton, Ontario, Canada.  
47  
48

49 18 <sup>6</sup>Department of Economics, McMaster University, Hamilton, Ontario, Canada.  
50  
51

52 19 <sup>7</sup>Department of Medicine, McMaster University, Hamilton, Ontario, Canada.  
53  
54

55 20  
56  
57  
58  
59  
60

1  
2  
3 21 **Corresponding Author**  
4  
5

6 22 Aaron Jones, MSc  
7

8 23 PhD Candidate  
9

10 24 Department of Health Research Methods, Evidence, and Impact  
11

12 25 McMaster University  
13

14 26 1280 Main St. W., Hamilton, L8S 4K1  
15

16 27 e: [jonesa13@mcmaster.ca](mailto:jonesa13@mcmaster.ca)  
17

18 28 p: 416-912-9276  
19  
20  
21

22 29 **Funding Sources/Disclosures**  
23  
24

25 30 This study was funded by grants from the Canadian Frailty Network (TG2015-15P) and the Canadian  
26 31 Institutes for Health Research (148933). The opinions and conclusions expressed in this article are those  
27 32 of the authors and do not necessarily reflect the views of the contributing centers or funders.  
28  
29  
30  
31  
32

33 33 **Conflicts of interest**  
34  
35

36 34 None to report.  
37  
38

39 35 **Acknowledgments**  
40  
41

42 36 This study was supported by ICES, which is funded by an annual grant from the Ontario Ministry of  
43 37 Health and Long-Term Care (MOHLTC). The opinions, results and conclusions reported in this paper are  
44 38 those of the authors and are independent from the funding sources. No endorsement by ICES or the  
45 39 Ontario MOHLTC is intended or should be inferred.  
46  
47  
48  
49  
50  
51

52 40 **Data sharing statement**  
53  
54  
55  
56  
57  
58  
59  
60

1  
2  
3 41 The dataset from this study is held securely in coded form at ICES. While data sharing agreements  
4  
5 42 prohibit ICES from making the dataset publicly available, access may be granted to those who meet pre-  
6  
7 43 specified criteria for confidential access, available at [www.ices.on.ca/DAS](http://www.ices.on.ca/DAS). The full dataset creation plan  
8  
9 44 and underlying analytic code are available from the authors upon request, understanding that the  
10  
11 45 computer programs may rely upon coding templates or macros that are unique to ICES and are  
12  
13 46 therefore either inaccessible or may require modification.  
14  
15  
16

#### 17 **Author contributions**

18  
19  
20 48 Aaron Jones and Andrew Costa conceived the study and developed the design in consultation with  
21  
22 49 the authors. Aaron Jones completed the analysis and drafted the initial manuscript. All authors  
23  
24 50 contributed to the interpretation of data, the critical revision of the manuscript for important  
25  
26 51 intellectual content, and approved the final version submitted for publication.  
27  
28  
29

#### 30 **Word count**

31  
32  
33 53 Abstract: 243  
34  
35

36 54 Manuscript: 2,496  
37  
38

39 55 **Tables:** 4  
40  
41

42 56 **Figures:** 1  
43  
44

45 57 **Appendices (Online):** 3  
46  
47

48 58  
49  
50

51 59  
52  
53

54 60  
55  
56  
57  
58  
59  
60

1  
2  
3 61 **Abstract**  
4  
5

6 62 **Background**  
7  
8

9 63 Robust and integrated primary care and home care are core components of effective chronic disease  
10  
11 64 management in the community. However, primary care use by home care patients is not well studied.  
12  
13  
14 65 We examined the primary care and other health system use of a cohort of home care patients.  
15

16  
17 66 **Methods**  
18  
19

20 67 We conducted a population-based retrospective cohort study of publicly-funded home care patients in  
21  
22 68 Ontario, Canada from October 2014 to September 2016. Primary outcomes were patterns of primary  
23  
24 69 care physician visits including coordination with home care, home visits, and afterhours/weekend visits  
25  
26 70 within six months of a home care assessment. Secondary outcomes included specialist physician visits,  
27  
28 71 emergency department use, home care visits, and long-term care home placement. Multivariable  
29  
30 72 models examined associations between patient characteristics and subsequent patterns of primary care  
31  
32 73 use.  
33  
34  
35

36 74 **Results**  
37  
38

39 75 Our cohort identified 226,054 home care patients with a median age of 81. Following assessment, home  
40  
41 76 care patients visited primary care physicians at a rate of 0.78 visits per month. Physician-based home  
42  
43 77 care coordination codes were billed for 3.9% of patients. Primary care home visits were received by  
44  
45 78 13.1% of patients, and 15.1% of patients utilized afterhours/weekend primary care.  
46  
47  
48

49 79 **Interpretation**  
50  
51

52 80 Publicly-funded home care patients frequently visited a primary care physician but billing claims for  
53  
54 81 coordination between primary care and home care were infrequent. Physician home visits were more  
55  
56  
57  
58  
59  
60

1  
2  
3 82 likely to be received by the oldest and most functionally impaired patients, suggesting that home visits  
4  
5 83 are responsive to the needs of home care patients.  
6  
7  
8  
9 84

## 10 11 85 **Background**

12  
13  
14 86 Chronic disease management models frequently emphasize the importance of quality primary care for  
15  
16 87 effective chronic disease management in the community.<sup>1-3</sup> Coordinated care can reduce depressive  
17  
18 88 symptoms and improve the functional status of older adults with multimorbidity.<sup>4</sup> Home-based primary  
19  
20 89 care has been shown to reduce emergency department (ED) visits and hospitalizations in homebound  
21  
22 90 older adults.<sup>5</sup> Access to timely primary care and afterhours primary care could reduce ED visits.<sup>6,7</sup>  
23  
24 91 However, research suggests that older adults with complex care needs frequently experience  
25  
26 92 fragmentation of care and difficulty accessing primary care<sup>8</sup>.

27  
28  
29  
30  
31 93 Home care patients are a population of complex community-dwelling older adults characterized by  
32  
33 94 multiple chronic conditions, need for support in activities of daily living, and a high risk of adverse  
34  
35 95 outcomes.<sup>9,10</sup> Aging strategies have frequently called for robust and responsive primary care and home  
36  
37 96 care to enable seniors to live well in the community as long as possible<sup>11,12</sup>. However, the patterns of  
38  
39 97 primary care use by home care patients have not been well studied.  
40  
41  
42

43 98 The objective of this study was to describe the primary care physician use of publicly-funded home care  
44  
45 99 patients in Ontario, including coordination between home care and primary care and advanced access to  
46  
47 100 primary care such as home visits and afterhours/weekend care. We examined associations between  
48  
49 101 patient characteristics and primary care use and also described the use of other health sectors to  
50  
51 102 contextualize our findings.  
52  
53

## 54 55 103 **Methods**

56  
57  
58  
59  
60

## 104 **Study Design and Data Sources**

105 This study identified a population-based, retrospective cohort of adults in Ontario, Canada who received  
106 a comprehensive home care assessment and used multiple health administrative databases to identify  
107 patterns of health system use following the assessment. A description of all data sources can be found  
108 in Appendix 1. These datasets were linked using unique encoded identifiers and analyzed at ICES. This  
109 study was a granted an exemption of formal ethics review from the Hamilton Integrated Research Ethics  
110 Board.

## 111 **Study Cohort**

112 All publicly-funded home care patients in Ontario who are receiving on-going care are periodically  
113 assessed with the Resident Assessment Instrument for Home Care (RAI-HC), a comprehensive clinical  
114 assessment<sup>13</sup>. We selected all RAI-HC assessments of adult (19+), home care patients completed in  
115 Ontario between October 1, 2014 and September 30, 2016. If an individual was assessed more than  
116 once during the period, their most recent assessment was selected. The assessment date was  
117 considered the index date for follow-up. Patients receiving palliative home care at baseline were  
118 excluded from the cohort as their health utilization patterns and outcomes vary greatly from other  
119 home care patients.

## 120 **Baseline Characteristics**

121 Patient characteristics were identified from the baseline assessment and included demographic, health  
122 and functional characteristics, frailty<sup>10</sup>, and health-related quality of life<sup>14</sup>. We identified patients with  
123 three key conditions known to be primary drivers of home care: congestive heart failure, chronic  
124 pulmonary obstructive disease (COPD), and dementia.<sup>15-17</sup> Similar to other studies<sup>18</sup> we also classified  
125 each patient's primary care enrollment models at baseline. The three main model types are: a) Family

1  
2  
3 126 Health Teams, which are team-based, interprofessional primary health care organizations funded  
4  
5 127 primarily through capitation payments; b) Other blended capitation models that are funded similarly but  
6  
7 128 lack the explicit interprofessional approach; and c) Enhanced fee-for-service models which are funded  
8  
9 129 primarily through billing claims. A few rural and specialty models were grouped together in an “Other”  
10  
11 130 category and patients not rostered with a physician were considered a distinct category.  
12  
13  
14

### 15 131 **Primary care use among home care patients**

16  
17

18 132 We linked the index assessment records to other health administrative databases to identify health  
19  
20 133 service use within six months (182 days) of the assessment date. A six-month follow-up was chosen as it  
21  
22 134 aligns with the standard RAI-HC assessment interval and at least three-quarters of patients can be  
23  
24 135 expected to experience a meaningful clinical change within six months<sup>19</sup>. Primary care physician (PCP)  
25  
26 136 visits were defined as office, home, or phone-based services provided by a general practice/family  
27  
28 137 practice physician or community medicine physician with a maximum of one visit per patient per  
29  
30 138 physician per day. We identified primary care coordination with home care using billing codes specific to  
31  
32 139 PCP supervision of home care or participation of a PCP in a case conference concerning a home care  
33  
34 140 patient. For measures of advanced access, we identified PCP visits to a patient’s home and PCP visits  
35  
36 141 that occurred afterhours or on a weekend or holiday. Details of the calculation of each physician  
37  
38 142 measure can be found in Appendix 2.  
39  
40  
41  
42

### 43 143 **Other health system use among home care patients**

44  
45

46 144 To contextualize the primary care use, we also measured other health sector use of patients and their  
47  
48 145 transitions between care settings. Specialist physician visits were defined similarly to primary care and  
49  
50 146 included all physicians other than general practice/family practice, community medicine, and pediatrics.  
51  
52 147 Home care use was measured as hours of personal support and number of home nursing visits. Other  
53  
54 148 measures included: unplanned ED visits, unplanned acute hospital admissions, long-term care home  
55  
56  
57  
58  
59  
60

1  
2  
3 149 admission, and death. We also tracked the care setting of the patient (community, hospital, long-term  
4  
5 150 care, dead) across the six-month follow-up period and calculated the total number of transitions in care  
6  
7  
8 151 settings.

9  
10  
11 152 **Descriptive analysis**

12  
13  
14 153 We reported the proportions of patients with any PCP visit, PCP coordination with home care, PCP home  
15  
16 154 visit, and PCP afterhours/weekend visit, and the rate of PCP visits per month. We also reported the  
17  
18 155 proportion of patients with any specialist physician visit, the average number of specialties seen and the  
19  
20 156 rate of specialist physician visits per month. For home care we reported the proportions of patients  
21  
22 157 who received or were authorized at baseline for personal support and home nursing as well as the rate  
23  
24 158 of visits/hours per month among patients with the service. Other measures reported included the  
25  
26 159 proportions of patients with an unscheduled ED visit, acute hospital admission, and long-term care  
27  
28  
29 160 home admission, the rate of ED visits per month, the average number of transitions of care settings, and  
30  
31 161 the proportion of patients who died in the follow-up window.

32  
33  
34  
35 162 All rates were based on the number of days during follow-up that the patient spent in the community,  
36  
37 163 i.e. not dead, in a long-term care home, or in hospital. Home care use rates were additionally restricted  
38  
39 164 to exclude days after home care services were discharged when applicable. Monthly rates were  
40  
41 165 produced by multiplying the daily rate by 30. Additionally, the proportion of patients who received a  
42  
43 166 PCP home visit was reported by functional impairment strata and we stratified the proportion of  
44  
45 167 patients with PCP coordination with home care by Ontario's 14 health regions to explore potential  
46  
47 168 variation in the rates based on regional initiatives to promote coordination. All descriptive measures  
48  
49  
50 169 were reported both for the entire cohort as well as the important subpopulations with congestive heart  
51  
52 170 failure, COPD, and dementia.

53  
54  
55  
56 171



## 172 **Multivariable analysis**

173 We fit multivariable regression models to examine associations between patient characteristics and the  
174 primary care use measures. The rate of PCP visits was fit with a quasi-poisson generalized linear model<sup>20</sup>  
175 with an offset term for days spent in the community. The proportions of PCP coordination with home  
176 care, PCP home visit, and a PCP afterhours/weekend visit were separately fit with logistic regression  
177 models. Each model included the following independent variables: sex, age, region, rurality, patient  
178 enrollment model type, home care services received or authorized at baseline, functional impairment,  
179 cognitive impairment, mood symptoms, comorbid conditions, and number of concurrent medications.  
180 Results were reported as rate ratios or odds ratios with 95% confidence intervals. All analyses were  
181 performed using SAS 9.4.

## 182 **Results**

183 Our cohort identified 226,054 adult home care patients with an assessment between October 1, 2014  
184 and September 30, 2016. The median age of patients in the cohort was 81 years and just under two-  
185 thirds (63%) were female (Table 1). Over 40% of patients needed at least limited assistance with  
186 personal hygiene, locomotion, eating, or toileting, and over 60% had at least a mild cognitive  
187 impairment. Around 13% of patients had a diagnosis of congestive heart failure at baseline, 20% had  
188 COPD, and 25% had a diagnosis of dementia. Roughly 30% of patients were enrolled in each of the three  
189 broad types of primary care patient enrollment models at baseline. Transitions between care settings  
190 across the follow-up period were common (Figure 1). At the end of six months, 71% of the patients were  
191 still living in the community, 13% were in long-term care homes, 4% were in hospitals, and 13% had  
192 died.

193 **Table 1: Baseline characteristics of adult home care patients, Ontario, September 2014 to October 2016**

194 <Insert Table 1 here >

1  
2  
3 195 **Figure 1: Transitions between care settings, adult home care patients, Ontario, September 2014 to**  
4  
5 196 **October 2016**

6  
7 197 <Insert Figure 1 here>

8  
9  
10 198 **Primary care use among home care patients**

11  
12  
13 199 The overall PCP visit rate during the follow-up period was 0.78 visits per month (Table 2), with 84% of  
14 200 patients having at least one PCP visit. Billing claims related to PCP coordination with home care  
15 201 occurred in only 3.9% of patients. PCP home visits were received by 13.1% of patients and 15.1% of  
16 202 patients used after hours/weekend primary care. Patients with congestive health failure and COPD had  
17 203 somewhat higher primary care use than patients than the overall population. Among the most impaired  
18 204 patients, just over one-quarter (27.5%) received a PCP home visit (Table 3). Stratifying PCP coordination  
19 205 with home care by health regions revealed significant regional variation in the use of the codes,  
20 206 particularly in the differential between family health teams and other patient enrollment models  
21 207 (Appendix 3).

22  
23  
24 208 **Table 2: Primary care physician and other health system use, adult home care patients, Ontario,**  
25 209 **September 2014 to October 2016**

26  
27 210 <Insert Table 2 here>

28  
29 211 **Table 3: Proportion of patients with a PCP home visit by functional impairment strata**

30 212 <Insert Table 3 here>

31  
32  
33 213 **Other health system use among home care patients**

34  
35 214 Around three-quarter of patients received personal support while just over a third received home  
36 215 nursing. Nearly half of patients visited the ED and over a quarter had an unplanned hospital admission  
37 216 across the six-month follow-up. Patients with congestive heart failure or COPD had higher rates of ED

1  
2  
3 217 visits, hospitalizations, and death. Patients with dementia had similar ED, and hospital utilization as the  
4  
5 218 overall population, but were significantly more likely to be admitted to a long-term care home.  
6  
7

8  
9 **219 Multivariable analysis**

10  
11 220 Increasing age, enrollment in an enhanced fee-for-service model, home care nursing, and having 9 or  
12  
13 221 more prescription medications at baseline was associated with greater primary care use (Table 3). PCP  
14  
15 222 coordination with home care was more common when a patient was enrolled with a family health team,  
16  
17 223 receive or was authorized at baseline for home care nursing, or resided in southern Ontario. Age, severe  
18  
19 224 functional impairment, and home care nursing were strongly associated with an increased likelihood of  
20  
21 225 receiving a PCP home visit. Finally, enrollment in an enhanced fee-for-service model was associated  
22  
23 226 with higher likelihood of an afterhours/weekend primary care visit, while living in eastern or northern  
24  
25 227 Ontario or in a rural location was negatively associated.  
26  
27  
28  
29

30 **228 Table 4: Multivariable regression models of PCP use**

31  
32 229 <Insert Table 4 here>  
33  
34

35  
36 **230 Interpretation**

37  
38 231 Publicly-funded home care patients with continuing care needs frequently utilized primary care and  
39  
40 232 other health services within six months of assessment. Nearly all of the patients visited a primary care  
41  
42 233 physician at least once, however just under 4% had a billing for home care coordination, 13% had a  
43  
44 234 primary care physician home visit, and 15% used primary care afterhours or a weekend or holiday.  
45  
46 235 Coordination codes were more common in interprofessional primary care practices while afterhours  
47  
48 236 care was more prevalent in non-capitated practices. Physician home visits were more likely to be  
49  
50 237 received by the oldest and most functionally impaired patients.  
51  
52  
53  
54  
55  
56  
57  
58  
59  
60

1  
2  
3 238 Comparing primary care use between studies can be imprecise due to differences in methodology and  
4  
5 239 time frames, but a study with similar primary care definitions to ours reported a PCP visit rate of 0.52  
6  
7 240 visits per month among all older adults in Ontario<sup>21</sup>. As home care patients in our study had a PCP visit  
8  
9 241 rate of 0.78 per month, this suggests home care patients had around 50% higher primary care use than a  
10  
11 242 general older adult population. Looking at other health sectors, comparisons with the same study  
12  
13 243 suggest home care patients had twice the specialist physician use and 3.5 times the ED visits of an older  
14  
15 244 adult population.  
16  
17  
18

19 245 The billing codes specific to PCP coordination with home care were rarely used. This could suggest low  
20  
21 246 levels of coordination possibly due to difficulties in communication and lack of integration between  
22  
23 247 home care and primary care<sup>22</sup>. However, it may also be the result of the coordination codes not being  
24  
25 248 billed due to lack of awareness of the specific codes or a sense that the codes are not worth the effort of  
26  
27 249 claiming. Family health teams were considerably more likely than other enrollment models to bill the  
28  
29 250 coordination codes, which could be due to their interprofessional orientation, or that regional planning  
30  
31 251 organizations specifically target family health teams in initiatives to promote coordination. For  
32  
33 252 example, in some regions home care coordinators have been aligned with specific family health teams  
34  
35 253 and may work out of the same office<sup>23</sup>. There was significant variation in the overall frequency of  
36  
37 254 coordination billing between different health planning regions, as well as in the difference between  
38  
39 255 family health teams and other models, suggesting that regional initiatives to promote coordination  
40  
41 256 influenced the rate of billing.  
42  
43  
44  
45  
46

47 257 Older patients with severe functional impairments were much more likely to receive a primary care  
48  
49 258 home visit than those without impairments, which suggests physician home visits are responsive to the  
50  
51 259 functional needs of patients. Around one quarter of patients (27.5%) with a severe functional  
52  
53 260 impairment received a PCP home visit, which is slightly higher than the 22% of a palliative patients in  
54  
55  
56  
57  
58  
59  
60

1  
2  
3 261 Ontario reported to have received a physician home visit in the last six months of life<sup>24</sup>. Even among  
4  
5 262 patients with the lowest levels of functional impairment however, almost 10% received a home visit.  
6  
7 263 Historically part of general practice, physician house calls in Canada have become more frequent  
8  
9  
10 264 recently after falling in previous decades partially due to changes in how primary care was funded<sup>25–28</sup>.  
11  
12  
13 265 Finally, home care patients enrolled in non-capitated models were considerably more likely than those  
14  
15 266 enrolled in capitation-based models to use afterhours or weekend primary care. This effect has been  
16  
17 267 previously noted, including in a study done shortly after the implementation of the first capitation  
18  
19 268 models in Ontario.<sup>29</sup> All enrollment models are mandated to make a minimum amount of afterhours  
20  
21 269 care available but differences how these models are funded could be contributing to fewer afterhours  
22  
23 270 visits in the capitated models.  
24  
25

26 271

## 27 272 **Limitations**

28  
29  
30  
31  
32 273 Our study has a number of strengths, including having a large, population-based sample and ability to  
33  
34 274 measure health service use across multiple sectors. There are also some important limitations. Our  
35  
36 275 measure of coordination between primary care and home care relies on three specific billing codes. The  
37  
38 276 degree to which this measure underrepresents the true level of coordination cannot be ascertained by  
39  
40 277 this study and would require qualitative, primary data collection. Also, findings around Ontario-specific  
41  
42 278 primary care models or billing codes may have less generalizability.  
43  
44  
45

## 46 279 **Conclusion**

47  
48  
49  
50 280 We found that home care patients with continuing care needs in Ontario, Canada frequently visited a  
51  
52 281 primary care physician. Physician billing claims specific to coordination between primary care and home  
53  
54 282 care were rarely utilized but may underrepresent the true level of coordination. Physician home visits  
55  
56  
57  
58  
59  
60

1  
2  
3 283 were more likely to be received the oldest and most functionally impaired patients, suggesting  
4  
5 284 responsiveness to patient needs. These findings provide important data on the primary care use of  
6  
7 285 home care patients and can inform future research on how patterns of primary care and home care can  
8  
9  
10 286 influence the health outcomes of home care patients.  
11  
12

13 287 **References**  
14  
15

- 16 288  
17 289 1. Rothman AA, Wagner EH. Chronic Illness Management: What Is the Role of Primary Care? *Ann*  
18 290 *Intern Med* 2003; 138: 256.  
19  
20 291 2. Grumbach K. Chronic Illness, Comorbidities, and the Need for Medical Generalism. *Ann Fam Med*  
21 292 2003; 1: 4–7.  
22  
23 293 3. The College of Family Physicians of Canada. *Best Advice: Chronic Care Management in a Patient's*  
24 294 *Medical Home*. June 2016.  
25  
26 295 4. Kastner M, Cardoso R, Lai Y, et al. Effectiveness of interventions for managing multiple high-  
27 296 burden chronic diseases in older adults: a systematic review and meta-analysis. *CMAJ* 2018; 190:  
28 297 E1004–E1012.  
29  
30 298 5. Stall N, Nowaczynski M, Sinha SK. Systematic review of outcomes from home-based primary care  
31 299 programs for homebound older adults. *J Am Geriatr Soc* 2014; 62: 2243–2251.  
32  
33 300 6. Mian O, Pong R. Does better access to FPs decrease the likelihood of emergency department use?:  
34 301 Results from the Primary Care Access Survey. *Can Fam Physician* 2012; 58: e658.  
35  
36 302 7. Uden CJT van, Crebolder HFJM. Does setting up out of hours primary care cooperatives outside a  
37 303 hospital reduce demand for emergency care? *Emerg Med J* 2004; 21: 722–723.  
38  
39 304 8. Schoen C, Osborn R, Squires D, et al. New 2011 Survey Of Patients With Complex Care Needs In  
40 305 Eleven Countries Finds That Care Is Often Poorly Coordinated. *Health Aff (Millwood)* 2011; 30:  
41 306 2437–2448.  
42  
43 307 9. Wilson D, Truman C. Comparing the health services utilization of long-term-care residents, home-  
44 308 care recipients, and the well elderly. *Can J Nurs Res* 2005; 37: 138–154.  
45  
46 309 10. Campitelli MA, Bronskill SE, Hogan DB, et al. The prevalence and health consequences of frailty in a  
47 310 population-based older home care cohort: a comparison of different measures. *BMC Geriatr* 2016;  
48 311 16: 133.  
49  
50 312 11. Sinha S. *Living Longer, Living Well*. Toronto, ON: Ontario Ministry of Health and Long-Term Care,  
51 313 20 December 2012.  
52  
53  
54  
55  
56  
57  
58  
59  
60

- 1  
2  
3 314 12. Canadian Medical Association. *The State of Seniors Health Care in Canada*. September 2016.  
4  
5 315 13. Canadian Institute for Health Information. *Home Care Reporting System Data Users Guide 2017-*  
6 316 *2018*. Ottawa, 2019.  
7  
8 317 14. Hirdes JP, Bernier J, Garner R, et al. Measuring health related quality of life (HRQoL) in community  
9 318 and facility-based care settings with the interRAI assessment instruments: development of a  
10 319 crosswalk to HUI3. *Qual Life Res* 2018; 27: 1295–1309.  
11  
12 320 15. Fergenbaum J, Bermingham S, Krahn M, et al. Care in the Home for the Management of Chronic  
13 321 Heart Failure: Systematic Review and Cost-Effectiveness Analysis. *J Cardiovasc Nurs* 2015; 30: S44-  
14 322 51.  
15  
16 323 16. Clarkson P, Davies L, Jasper R, et al. A Systematic Review of the Economic Evidence for Home  
17 324 Support Interventions in Dementia. *Value Health J Int Soc Pharmacoeconomics Outcomes Res*  
18 325 2017; 20: 1198–1209.  
19  
20 326 17. Cruz J, Brooks D, Marques A. Home telemonitoring effectiveness in COPD: a systematic review. *Int*  
21 327 *J Clin Pract* 2014; 68: 369–378.  
22  
23 328 18. Green M, Gozdyra P, Frymire E, et al. *Geographic Variation in the Supply and Distribution of*  
24 329 *Comprehensive Primary Care Physicians in Ontario, 2014/15*. Toronto, ON: Institute for Clinical  
25 330 Evaluative Sciences, 2017.  
26  
27 331 19. Poss J. Mind The Gap? Looking at Reassessment Patterns among Ontario Long-Stay Home Care  
28 332 Clients. In: *2009 Canadian interRAI Conference*. Halifax, NS, 2009.  
29  
30 333 20. Wedderburn RW. Quasi-likelihood functions, generalized linear models, and the Gauss—Newton  
31 334 method. *Biometrika* 1974; 61: 439–447.  
32  
33 335 21. Nie JX, Wang L, Tracy CS, et al. A population-based cohort study of ambulatory care service  
34 336 utilization among older adults. *J Eval Clin Pract* 2010; 16: 825–831.  
35  
36 337 22. Expert Group on Home and Community Care. *Bringing Care Home*. Toronto: Ontario Ministry of  
37 338 Health and Long-Term Care, March 2015.  
38  
39 339 23. Association of Family Health Teams of Ontario. *Case Study: Effectively Embedding Care*  
40 340 *Coordinators within Primary Care*. Toronto, May 2016.  
41  
42 341 24. Howard M, Chalifoux M, Tanuseputro P. Does Primary Care Model Effect Healthcare at the End of  
43 342 Life? A Population-Based Retrospective Cohort Study. *J Palliat Med* 2016; 20: 344–351.  
44  
45 343 25. Walkinshaw E. Back to black bag and horse-and-buggy medicine. *CMAJ* 2011; 183: 1829–1830.  
46  
47 344 26. Chan BTB. The declining comprehensiveness of primary care. *CMAJ* 2002; 166: 429–434.  
48  
49 345 27. Office of the Premier. *Ontario Expanding House Call Services*,  
50 346 <https://news.ontario.ca/opo/en/2012/12/ontario-expanding-house-call-services.html> (11  
51 347 December 2012).  
52  
53  
54  
55  
56  
57  
58  
59  
60

1  
2  
3  
4  
5  
6  
7  
8  
9  
10  
11  
12  
13  
14  
15  
16  
17  
18  
19  
20  
21  
22  
23  
24  
25  
26  
27  
28  
29  
30  
31  
32  
33  
34  
35  
36  
37  
38  
39  
40  
41  
42  
43  
44  
45  
46  
47  
48  
49  
50  
51  
52  
53  
54  
55  
56  
57  
58  
59  
60

348 28. Palmer K, Konkin J, Michael N. House calls on the rise in Ontario. *Healthy Debate*,  
349 <https://healthydebate.ca/2017/08/topic/house-calls-rise-ontario> (2017).  
350 29. Glazier RH, Klein-Geltink J, Kopp A, et al. Capitation and enhanced fee-for-service models for  
351 primary care reform: a population-based evaluation. *CMAJ* 2009; 180: E72–E81.  
352  
353  
354

Confidential



**Table 1:** Baseline characteristics of adult home care patients in Ontario, September 2014 to October 2016

| Patient Characteristics                                      | No. (%) of patients<br>n=226,054 |
|--------------------------------------------------------------|----------------------------------|
| <b>Demographics</b>                                          |                                  |
| Age, yrs (Median (Q1-Q3))                                    | 81 (71-88)                       |
| Sex, female                                                  | 83978 (62.9)                     |
| Lived Alone                                                  | 110137 (48.7)                    |
| <b>Health</b>                                                |                                  |
| Activities of Daily Living (ADL) impairment <sup>1</sup>     |                                  |
| Independent/Supervision                                      | 127725 (56.5)                    |
| Limited/Extensive                                            | 72220 (32.0)                     |
| Maximal/ Dependent                                           | 26109 (11.6)                     |
| Cognitive impairment <sup>2</sup>                            |                                  |
| Intact / Borderline intact                                   | 85613 (37.9)                     |
| Mild / Moderate                                              | 121081 (53.6)                    |
| Severe                                                       | 19360 (8.6)                      |
| Mood symptoms <sup>3</sup>                                   |                                  |
| No symptoms                                                  | 108918 (48.2)                    |
| Some symptoms                                                | 59684 (26.4)                     |
| Daily symptoms                                               | 57452 (25.4)                     |
| Bladder incontinence                                         | 94535 (41.8)                     |
| Fall in last 90 days                                         | 91962 (40.7)                     |
| Five or more concurrent medications                          | 189760 (83.9)                    |
| Congestive heart failure                                     | 29875 (13.2)                     |
| COPD                                                         | 44209 (19.6)                     |
| Dementia                                                     | 58413 (25.8)                     |
| Frailty Index                                                |                                  |
| Robust (0-0.19)                                              | 46043 (20.4)                     |
| Pre-frail (0.2-0.29)                                         | 68562 (30.3)                     |
| Frail (>= 0.3)                                               | 111449 (49.3)                    |
| Health-related quality of life (Median (Q1-Q3)) <sup>4</sup> | 0.19 (-0.01-0.42)                |
| <b>Patient Enrollment Model Type</b>                         |                                  |
| Enhanced fee-for-service                                     | 73150 (28.7)                     |
| Family health team                                           | 75031 (32.4)                     |
| Other capitation                                             | 64908 (33.2)                     |
| Other                                                        | 8403 (2.0)                       |
| Not enrolled                                                 | 4562 (3.7)                       |

1 ADL Hierarchy Scale: Includes personal hygiene, locomotion, eating and toileting

2 Cognitive Performance Scale

3 Depression Rating Scale

4 HUI3 scores are based on a scale where 1 represents perfect health and 0 represents dead

The range of the values is -0.36 to 1 with scores less than 0 representing states worse than dead

1  
2  
3  
4  
5  
6  
7  
8  
9  
10  
11  
12  
13  
14  
15  
16  
17  
18  
19  
20  
21  
22  
23  
24  
25  
26  
27  
28  
29  
30  
31  
32  
33  
34  
35  
36  
37  
38  
39  
40  
41  
42  
43  
44  
45  
46  
47  
48  
49  
50  
51  
52  
53  
54  
55  
56  
57  
58  
59  
60

Confidential

1  
2  
3  
4  
5  
6  
7  
8  
9  
10  
11  
12  
13  
14  
15  
16  
17  
18  
19  
20  
21  
22  
23  
24  
25  
26  
27  
28  
29  
30  
31  
32  
33  
34  
35  
36  
37  
38  
39  
40  
41  
42  
43  
44  
45  
46  
47  
48  
49  
50  
51  
52  
53  
54  
55  
56  
57  
58  
59  
60

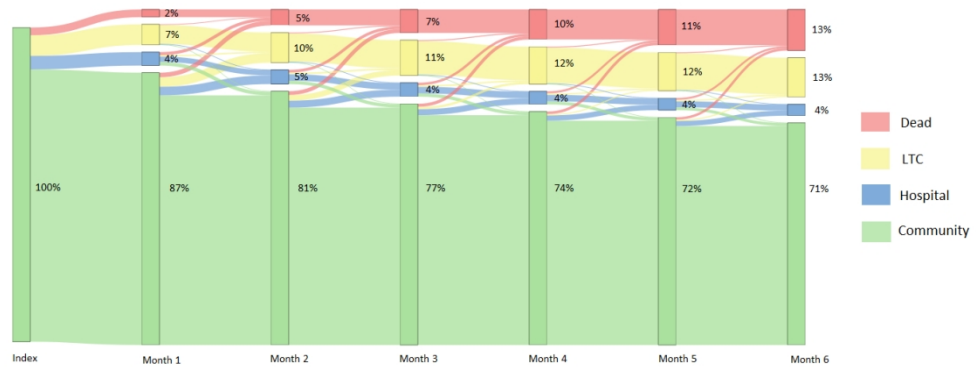

Figure 1: Transitions between care settings, adult home care patients, Ontario, September 2014 to October 2016

**Table 2:** Primary care physician and other health system use, adult home care patients, Ontario, September 20

| Health Utilization Measure                    | All<br>n=226,054 | Chronic Conditions        |                  |                      |
|-----------------------------------------------|------------------|---------------------------|------------------|----------------------|
|                                               |                  | Heart Failure<br>n=29,875 | COPD<br>n=44,209 | Dementia<br>n=58,413 |
| <b>Primary Care</b>                           |                  |                           |                  |                      |
| Any PCP visit (%)                             | 84.4%            | 85.7%                     | 85.7%            | 82.0%                |
| Rate of PCP visits per month                  | 0.78             | 0.94                      | 0.86             | 0.79                 |
| Any PCP home care coordination (%)            | 3.9%             | 5.1%                      | 4.7%             | 3.5%                 |
| Any PCP home visit (%)                        | 13.1%            | 16.3%                     | 13.5%            | 14.8%                |
| Any PCP afterhours/weekend visit (%)          | 15.1%            | 15.2%                     | 15.2%            | 13.2%                |
| <b>Other Health Sectors</b>                   |                  |                           |                  |                      |
| Any specialist visit (%)                      | 68.1%            | 70.8%                     | 70.4%            | 55.5%                |
| Rate of specialist visits per month           | 0.60             | 0.70                      | 0.64             | 0.42                 |
| Average count of specialties seen             | 1.50             | 1.64                      | 1.62             | 1.00                 |
| Any personal support (%)                      | 71.8%            | 77.7%                     | 73.8%            | 78.5%                |
| Any home nursing (%)                          | 35.7%            | 46.3%                     | 41.5%            | 24.5%                |
| Rate of personal support hours per month      | 22.3             | 23.4                      | 20.4             | 29.3                 |
| Rate of home nursing visits per month         | 6.8              | 6.3                       | 6.1              | 5.1                  |
| Any ED visit (%)                              | 46.9%            | 58.4%                     | 55.0%            | 46.7%                |
| Any acute care hospitalization (%)            | 27.2%            | 40.2%                     | 34.3%            | 27.7%                |
| LTCH admission (%)                            | 15.7%            | 15.5%                     | 13.4%            | 34.1%                |
| Death (%)                                     | 13.2%            | 23.2%                     | 17.3%            | 14.7%                |
| Rate of ED visits per month                   | 0.17             | 0.25                      | 0.23             | 0.15                 |
| Transitions of care settings (%) <sup>1</sup> |                  |                           |                  |                      |
| 0                                             | 60.4%            | 50.0%                     | 56.3%            | 47.5%                |
| 1-2                                           | 28.4%            | 33.7%                     | 29.4%            | 40.7%                |
| 3+                                            | 11.2%            | 16.4%                     | 14.4%            | 11.8%                |

<sup>1</sup> Includes transfers between any of the following: community, acute hospital, rehab hospital, mental health hospital, continuing care hospital, or long-term care home

1  
2  
3 2014 to October 2016  
4  
5  
6  
7  
8  
9  
10  
11  
12  
13  
14  
15  
16  
17  
18  
19  
20  
21  
22  
23  
24  
25  
26  
27  
28  
29  
30  
31  
32  
33  
34  
35  
36  
37  
38  
39  
40  
41  
42  
43  
44  
45  
46  
47  
48  
49  
50  
51  
52  
53  
54  
55  
56  
57  
58  
59  
60

Confidential

1  
2  
3  
4  
5  
6  
7  
8  
9  
10  
11  
12  
13  
14  
15  
16  
17  
18  
19  
20  
21  
22  
23  
24  
25  
26  
27  
28  
29  
30  
31  
32  
33  
34  
35  
36  
37  
38  
39  
40  
41  
42  
43  
44  
45  
46  
47  
48  
49  
50  
51  
52  
53  
54  
55  
56  
57  
58  
59  
60

**Table 3:** Proportion of patients with a PCP home visit by functional impairment strata

| <b>ADL Impairment</b>   | <b>PCP home visit (%)</b> |
|-------------------------|---------------------------|
| Independent/Supervision | 9.3                       |
| Limited/Extensive       | 14.5                      |
| Maximal/ Dependent      | 27.5                      |

Confidential

**Table 4:** Multivariable regression models of PCP use

| Variable                                   |                          | PCP visits |              | PCP home care coordination |              |
|--------------------------------------------|--------------------------|------------|--------------|----------------------------|--------------|
|                                            |                          | Rate Ratio | 95% CI       | Odds Ratio                 | 95% CI       |
| Sex                                        | Female vs. Male          | 0.97       | (0.95, 0.98) | 1.01                       | (0.96, 1.06) |
|                                            |                          |            |              |                            |              |
| Age                                        | 19-59                    | (ref)      | (ref)        | (ref)                      | (ref)        |
|                                            | 60-69                    | 1.02       | (0.98, 1.05) | 0.94                       | (0.86, 1.03) |
|                                            | 70-79                    | 1.08       | (1.05, 1.12) | 1.01                       | (0.93, 1.10) |
|                                            | 80-89                    | 1.15       | (1.11, 1.18) | 1.02                       | (0.95, 1.11) |
|                                            | 90+                      | 1.20       | (1.16, 1.25) | 1.02                       | (0.93, 1.12) |
| Region <sup>1</sup>                        | Central                  | (ref)      | (ref)        | (ref)                      | (ref)        |
|                                            | East                     | 0.96       | (0.94, 0.99) | 0.95                       | (0.89, 1.01) |
|                                            | North                    | 0.84       | (0.81, 0.87) | 1.11                       | (1.02, 1.20) |
|                                            | South                    | 1.07       | (1.05, 1.09) | 1.41                       | (1.34, 1.48) |
| Rurality <sup>2</sup>                      | Rural vs. Urban          | 0.96       | (0.94, 0.99) | 1.06                       | (1.00, 1.13) |
| Patient enrollment model type <sup>3</sup> | EFS                      | (ref)      | (ref)        | (ref)                      | (ref)        |
|                                            | FHT                      | 0.77       | (0.76, 0.79) | 2.73                       | (2.57, 2.90) |
|                                            | Other Capitation         | 0.80       | (0.78, 0.82) | 1.24                       | (1.16, 1.32) |
|                                            | Other                    | 0.66       | (0.62, 0.71) | 0.87                       | (0.70, 1.07) |
|                                            | Not enrolled             | 0.79       | (0.75, 0.83) | 0.66                       | (0.55, 0.79) |
| Home care services                         | Personal support         | 0.98       | (0.96, 1.00) | 1.18                       | (1.12, 1.25) |
|                                            | Nursing                  | 1.34       | (1.31, 1.36) | 3.21                       | (3.07, 3.36) |
| Function                                   | Independent/Supervision  | (ref)      | (ref)        | (ref)                      | (ref)        |
|                                            | Mild/Moderate impairment | 1.01       | (0.99, 1.03) | 1.06                       | (1.01, 1.12) |
|                                            | Severe impairment        | 1.05       | (1.02, 1.08) | 1.06                       | (0.98, 1.14) |
| Cognition                                  | Independent/Supervision  | (ref)      | (ref)        | (ref)                      | (ref)        |
|                                            | Mild/Moderate impairment | 0.98       | (0.97, 1.00) | 0.94                       | (0.90, 0.99) |
|                                            | Severe impairment        | 0.98       | (0.94, 1.02) | 1.00                       | (0.91, 1.09) |
| Mood                                       | No symptoms              | (ref)      | (ref)        | (ref)                      | (ref)        |
|                                            | Some symptoms            | 1.10       | (1.08, 1.13) | 1.12                       | (1.06, 1.18) |
|                                            | Daily symptoms           | 1.22       | (1.19, 1.24) | 1.17                       | (1.11, 1.24) |
| Chronic conditions                         | CHF                      | 1.12       | (1.09, 1.14) | 1.08                       | (1.01, 1.14) |
|                                            | COPD                     | 1.07       | (1.05, 1.09) | 1.06                       | (1.04, 1.12) |
|                                            | Dementia                 | 1.04       | (1.02, 1.07) | 0.99                       | (0.93, 1.05) |
| Number of medications                      | 0-4                      | (ref)      | (ref)        | (ref)                      | (ref)        |
|                                            | 5-8                      | 1.17       | (1.14, 1.21) | 1.03                       | (0.95, 1.11) |
|                                            | 9+                       | 1.38       | (1.34, 1.42) | 1.15                       | (1.07, 1.23) |

1: Region is defined by the first letter of a postal code: P - North, K - East, M,N - Central, L - South

1  
2  
3  
4  
5  
6  
7  
8  
9  
10  
11  
12  
13  
14  
15  
16  
17  
18  
19  
20  
21  
22  
23  
24  
25  
26  
27  
28  
29  
30  
31  
32  
33  
34  
35  
36  
37  
38  
39  
40  
41  
42  
43  
44  
45  
46  
47  
48  
49  
50  
51  
52  
53  
54  
55  
56  
57  
58  
59  
60

2: Rural is defined as having a postal code with a Rurality Index of Ontario 2008 score  $\geq$  40  
3: EFS - Enhanced fee-for-service, FHT - Family Health Team

Confidential



| PCP home visit |              | PCP afterhours/<br>weekend visit |              |
|----------------|--------------|----------------------------------|--------------|
| Odds Ratio     | 95% CI       | Odds Ratio                       | 95% CI       |
| 1.05           | (1.02, 1.08) | 1.08                             | (1.04, 1.1)  |
| (ref)          | (ref)        | (ref)                            | (ref)        |
| 1.34           | (1.25, 1.44) | 0.91                             | (0.86, 0.95) |
| 1.80           | (1.69, 1.92) | 0.95                             | (0.91, 1.00) |
| 2.63           | (2.47, 2.79) | 0.96                             | (0.92, 1.00) |
| 3.89           | (3.65, 4.14) | 0.96                             | (0.91, 1.01) |
| (ref)          | (ref)        | (ref)                            | (ref)        |
| 0.82           | (0.79, 0.85) | 0.55                             | (0.53, 0.57) |
| 0.61           | (0.58, 0.65) | 0.50                             | (0.47, 0.53) |
| 1.00           | (0.97, 1.03) | 1.10                             | (1.07, 1.13) |
| 0.88           | (0.84, 0.92) | 0.63                             | (0.60, 0.65) |
| (ref)          | (ref)        | (ref)                            | (ref)        |
| 0.78           | (0.76, 0.81) | 0.40                             | (0.39, 0.41) |
| 0.81           | (0.79, 0.84) | 0.64                             | (0.63, 0.66) |
| 1.03           | (0.93, 1.14) | 0.32                             | (0.28, 0.37) |
| 1.03           | (0.96, 1.10) | 0.44                             | (0.41, 0.47) |
| 1.46           | (1.41, 1.51) | 1.12                             | (1.09, 1.15) |
| 2.08           | (2.02, 2.13) | 1.22                             | (1.19, 1.26) |
| (ref)          | (ref)        | (ref)                            | (ref)        |
| 1.39           | (1.35, 1.43) | 1.00                             | (0.97, 1.03) |
| 2.69           | (2.59, 2.80) | 1.27                             | (1.22, 1.32) |
| (ref)          | (ref)        | (ref)                            | (ref)        |
| 1.07           | (1.03, 1.10) | 0.90                             | (0.88, 0.92) |
| 1.08           | (1.03, 1.13) | 0.90                             | (0.86, 0.95) |
| (ref)          | (ref)        | (ref)                            | (ref)        |
| 1.02           | (0.99, 1.06) | 1.05                             | (1.02, 1.08) |
| 1.10           | (1.07, 1.14) | 1.12                             | (1.09, 1.16) |
| 1.03           | (0.99, 1.07) | 0.97                             | (0.93, 1.00) |
| 1.08           | (1.04, 1.12) | 1.05                             | (1.02, 1.08) |
| 0.91           | (0.88, 0.94) | 0.80                             | (0.78, 0.83) |
| (ref)          | (ref)        | (ref)                            | (ref)        |
| 1.08           | (1.03, 1.13) | 1.13                             | (1.09, 1.17) |
| 1.20           | (1.15, 1.25) | 1.22                             | (1.18, 1.27) |

**Appendix 1: Database**

| <b>ICES Databases</b>                                                  |
|------------------------------------------------------------------------|
| <i>Discharge Abstract Database(DAD)</i>                                |
| <i>Ontario Health Insurance Policy Claims (OHIP)</i>                   |
| <i>National Ambulatory Care Reporting System (NACRS)</i>               |
| <i>Home care Database(HCD)</i>                                         |
| <i>Resident Assessment Instrument (RAI)- Home care source (OACCAC)</i> |
| <i>Ontario Mental Health Reporting System (OMHRS)</i>                  |
| <i>National Rehabilitation Reporting System(NRS)</i>                   |
| <i>Continuing Care Reporting System(CCRS)</i>                          |
| <i>The Corporate Provider Database (CPDB)</i>                          |

Confidential

*Registered Persons  
Database(RPDB)*

Confidential

1  
2  
3  
4  
5  
6  
7  
8  
9  
10  
11  
12  
13  
14  
15  
16  
17  
18  
19  
20  
21  
22  
23  
24  
25  
26  
27  
28  
29  
30  
31  
32  
33  
34  
35  
36  
37  
38  
39  
40  
41  
42  
43  
44  
45  
46  
47  
48  
49  
50  
51  
52  
53  
54  
55  
56  
57  
58  
59  
60

as used in the study

| Description                                                                                                                                                                                                                                                                                                                                                                                                                                                                                                                                                                                                                                                       |
|-------------------------------------------------------------------------------------------------------------------------------------------------------------------------------------------------------------------------------------------------------------------------------------------------------------------------------------------------------------------------------------------------------------------------------------------------------------------------------------------------------------------------------------------------------------------------------------------------------------------------------------------------------------------|
| <p>The DAD is compiled by the Canadian Institute for Health Information and contains administrative, clinical (diagnoses and procedures/interventions), demographic, and administrative information for all admissions to acute care hospitals, rehab, chronic, and day surgery institutions in Ontario. At ICES, consecutive DAD records are linked together to form ‘episodes of care’ among the hospitals to which patients have been transferred after their initial admission.</p>                                                                                                                                                                           |
| <p>The OHIP claims database contains information on inpatient and outpatient services provided to Ontario residents eligible for the province’s publicly funded health insurance system by fee-for-service health care practitioners (primarily physicians) and “shadow billings” for those paid through non-fee-for-service payment plans. The main data elements include patient and physician identifiers (encrypted), code for service provided, date of service, associated diagnosis, and fee paid.</p>                                                                                                                                                     |
| <p>The NACRS is compiled by the Canadian Institute for Health Information and contains administrative, clinical (diagnoses and procedures), demographic, and administrative information for all patient visits made to hospital- and community-based ambulatory care centres (emergency departments, day surgery units, hemodialysis units, and cancer care clinics). At ICES, NACRS records are linked with other data sources (DAD, OMHRS) to identify transitions to other care settings, such as inpatient acute care or psychiatric care.</p>                                                                                                                |
| <p>The HCD is a clinical client centric database that captures all services that are provided by or coordinated by Community Care Access Centres (CCACs). The data elements captured include information on: client, intake, assessment, admission &amp; discharge, diagnosis and surgical procedure, and care delivery. ICES receives home care data from the Ontario Ministry of Health and Long-Term Care (MOHLTC). The primary purpose of the information collected through the HCD is to aid in planning and better clinical insight into clients who encounter service through CCACs.</p>                                                                   |
| <p>The RAIHC database is managed by the Community Care Access Centres (CCACs) and is a standardized clinical assessment to all long-stay home care clients in Ontario defined as clients receiving ongoing support for at least 60 consecutive days. Data collected include comprehensive clinical, functional and resource utilization information that are used to inform client needs. When used over time, it provides the basis for an outcome-based assessment of the person’s response to care or services.</p>                                                                                                                                            |
| <p>The OMHRS is compiled by the Canadian Institute for Health Information and contains administrative, clinical (diagnoses and procedures), demographic, and administrative information for all admissions to adult designated inpatient mental health beds. This includes beds in general hospitals, provincial psychiatric facilities, and specialty psychiatric facilities. Clinical assessment data is ascertained using the Resident Assessment Instrument for Mental Health (RAI-MH), but different amounts of information are collected using this instrument depending on the length of stay in the mental health bed. Multiple assessments may occur</p> |
| <p>The NRS is compiled by the Canadian Institute for Health Information and contains client data collected from participating adult inpatient rehabilitation facilities and programs across Canada. Main data elements contain socio-demographic information, administrative data (e.g. referral, admission and discharge), health characteristics, activities and participation (e.g. ADL, communication, social interaction), and interventions.</p>                                                                                                                                                                                                            |
| <p>The CCRS database is compiled by the Canadian Institute for Health Information and contains demographic, clinical, functional, and resource utilization information for individuals receiving facility-based continuing care (also known as extended, auxiliary, or complex chronic care) in Ontario hospitals and residential care providing 24 hour nursing services (i.e. nursing home). Clinical assessment data (on the physical, functional, cognitive, and social domains of health) is ascertained using the Resident Assessment Instrument Minimum Data Set (RAI-MDS) version 2.0 which is administered by trained healthcare professionals.</p>      |
| <p>The Corporate Provider Database (CPDB) contains information on all physician and some non-physician (such as chiropractors, physiotherapists, and optometrist) providers funded by the Ministry, either through OHIP or other funding arrangements. The data includes demographic, eligibility, specialty, practice location, (encrypted) provider billing number, limited demographic information (year of birth, gender, year of graduation, specialty, and location of practice).</p>                                                                                                                                                                       |

1 The RPDB provides basic demographic information (age, sex, location of residence, date of birth, and date of  
2 death for deceased individuals) for those issued an Ontario health insurance number. The RPDB also  
3 indicates the time periods for which an individual was eligible to receive publicly funded health insurance  
4 benefits and the best known postal code for each registrant on July 1st of each year.  
5  
6  
7  
8  
9  
10  
11  
12  
13  
14  
15  
16  
17  
18  
19  
20  
21  
22  
23  
24  
25  
26  
27  
28  
29  
30  
31  
32  
33  
34  
35  
36  
37  
38  
39  
40  
41  
42  
43  
44  
45  
46  
47  
48  
49  
50  
51  
52  
53  
54  
55  
56  
57  
58  
59  
60

Confidential

**Appendix 2: Definitions of physician utilization measures**

| Measure                         | Database | Field   | Values     |
|---------------------------------|----------|---------|------------|
| PCP Visit                       | OHIP     | Spec    | 00 - FP/GP |
|                                 |          |         | 05 - Commu |
|                                 | OHIP     | Feecode | Any feecod |
|                                 |          |         | G202       |
|                                 |          |         | G212       |
|                                 |          |         | G372       |
|                                 |          |         | G373       |
|                                 |          |         | G365       |
|                                 |          |         | G538       |
|                                 |          |         | G539       |
| G590                            |          |         |            |
| G591                            |          |         |            |
| PCP coordination with home care | OHIP     | Spec    | 00 - FP/GP |
|                                 |          |         | 05 - Commu |
|                                 | OHIP     | Feecode | K071       |
|                                 |          |         | K072       |
| K124                            |          |         |            |
| PCP home visit                  | OHIP     | Spec    | 00 - FP/GP |
|                                 |          |         | 05 - Commu |
|                                 | OHIP     | Feecode | A900       |
|                                 |          |         | A901       |
|                                 |          |         | B960       |
|                                 |          |         | B961       |
|                                 |          |         | B962       |
|                                 |          |         | B963       |
|                                 |          |         | B964       |
|                                 |          |         | B966       |
|                                 |          |         | B990       |
|                                 |          |         | B992       |
|                                 |          |         | B993       |
|                                 |          |         | B994       |
| B996                            |          |         |            |
| B997                            |          |         |            |
| B998                            |          |         |            |
| PCP afterhours/weekend visit    | OHIP     | Spec    | 00 - FP/GP |
|                                 |          |         | 05 - Commu |
|                                 | OHIP     | Feecode | Q012       |
|                                 |          |         | Q016       |
|                                 |          |         | Q017       |
|                                 |          |         | B962       |
|                                 |          |         | B963       |
|                                 |          |         | B964       |
|                                 |          |         | B994       |
|                                 |          |         | B993       |
| B996                            |          |         |            |

A962

A963

A964

A994

A998

A996

A888

|                             |                |                     |
|-----------------------------|----------------|---------------------|
| Physician specialist visits | OHIP: Spec     | <b>Not</b> 00 - FP, |
|                             | OHIP: Location | Any feecod          |

Note: Visits were limited to 1 per patient per physician per day

Note: Visits were excluded if patient was in LTCH at time of billing

Confidential

1  
2  
3  
4  
5  
6  
7  
8  
9  
10  
11  
12  
13  
14  
15  
16  
17  
18  
19  
20  
21  
22  
23  
24  
25  
26  
27  
28  
29  
30  
31  
32  
33  
34  
35  
36  
37  
38  
39  
40  
41  
42  
43  
44  
45  
46  
47  
48  
49  
50  
51  
52  
53  
54  
55  
56  
57  
58  
59  
60

---

unity Medicine  
le with location of Office, Home, or Phone

---

unity Medicine

---

unity Medicine

---

unity Medicine

Confidential



1  
2  
3  
4  
5  
6  
7  
8  
9  
10  
11  
12  
13  
14  
15  
16  
17  
18  
19  
20  
21  
22  
23  
24  
25  
26  
27  
28  
29  
30  
31  
32  
33  
34  
35  
36  
37  
38  
39  
40  
41  
42  
43  
44  
45  
46  
47  
48  
49  
50  
51  
52  
53  
54  
55  
56  
57  
58  
59  
60

---

/GP, 05 - Community Medicine, or 26 - Pediatrics  
le with location of Office, Home, or Phone

---

g

Confidential

**Appendix 3. Proportion of patients with a PCP coordination with home care k**

| LHIN                             | PCP home care coordination (%) |         |
|----------------------------------|--------------------------------|---------|
|                                  | FHT                            | non-FHT |
| Erie St. Clair                   | 3.7                            | 3.7     |
| South West                       | 6.6                            | 6.2     |
| Waterloo Wellington              | 5.3                            | 1.5     |
| Hamilton Niagara Haldimand Brant | 12.5                           | 3.2     |
| Central West                     | 23.1                           | 6.2     |
| Mississauga Halton               | 1.7                            | 1.7     |
| Toronto Central                  | 3.0                            | 2.3     |
| Central                          | 3.5                            | 2.4     |
| Central East                     | 3.0                            | 1.7     |
| South East                       | 12.6                           | 3.7     |
| Champlain                        | 2.4                            | 1.1     |
| North Simcoe Muskoka             | 4.8                            | 2.6     |
| North East                       | 4.0                            | 4.2     |
| North West                       | 9.0                            | 1.2     |

Confidential

1  
2  
3 billing code by LHIN and FHT vs. non-FHT  
4  
5  
6  
7  
8  
9  
10  
11  
12  
13  
14  
15  
16  
17  
18  
19  
20  
21  
22  
23  
24  
25  
26  
27  
28  
29  
30  
31  
32  
33  
34  
35  
36  
37  
38  
39  
40  
41  
42  
43  
44  
45  
46  
47  
48  
49  
50  
51  
52  
53  
54  
55  
56  
57  
58  
59  
60

Confidential

| STROBE Statement—Checklist of items that should be included in reports of <i>cohort studies</i> |         |                                                                                                                                                                                                              |                     |
|-------------------------------------------------------------------------------------------------|---------|--------------------------------------------------------------------------------------------------------------------------------------------------------------------------------------------------------------|---------------------|
|                                                                                                 | Item No | Recommendation                                                                                                                                                                                               | Line #              |
| <b>Title and abstract</b>                                                                       | 1       | (a) Indicate the study's design with a commonly used term in the title or the abstract                                                                                                                       | 2                   |
|                                                                                                 |         | (b) Provide in the abstract an informative and balanced summary of what was done and what was found                                                                                                          | 61-83               |
| <b>Introduction</b>                                                                             |         |                                                                                                                                                                                                              |                     |
| Background/rationale                                                                            | 2       | Explain the scientific background and rationale for the investigation being reported                                                                                                                         | 86-97               |
| Objectives                                                                                      | 3       | State specific objectives, including any prespecified hypotheses                                                                                                                                             | 98-102              |
| <b>Methods</b>                                                                                  |         |                                                                                                                                                                                                              |                     |
| Study design                                                                                    | 4       | Present key elements of study design early in the paper                                                                                                                                                      | 105-110             |
| Setting                                                                                         | 5       | Describe the setting, locations, and relevant dates, including periods of recruitment, exposure, follow-up, and data collection                                                                              | 112-115<br>133      |
| Participants                                                                                    | 6       | (a) Give the eligibility criteria, and the sources and methods of selection of participants. Describe methods of follow-up                                                                                   | 112-115             |
|                                                                                                 |         | (b) For matched studies, give matching criteria and number of exposed and unexposed                                                                                                                          | NA                  |
| Variables                                                                                       | 7       | Clearly define all outcomes, exposures, predictors, potential confounders, and effect modifiers. Give diagnostic criteria, if applicable                                                                     | 120-152             |
| Data sources/<br>measurement                                                                    | 8*      | For each variable of interest, give sources of data and details of methods of assessment (measurement). Describe comparability of assessment methods if there is more than one group                         | App. 1-2            |
| Bias                                                                                            | 9       | Describe any efforts to address potential sources of bias                                                                                                                                                    | 162,177             |
| Study size                                                                                      | 10      | Explain how the study size was arrived at                                                                                                                                                                    | 114-119             |
| Quantitative variables                                                                          | 11      | Explain how quantitative variables were handled in the analyses. If applicable, describe which groupings were chosen and why                                                                                 | 153-181             |
| Statistical methods                                                                             | 12      | (a) Describe all statistical methods, including those used to control for confounding                                                                                                                        | 173-181             |
|                                                                                                 |         | (b) Describe any methods used to examine subgroups and interactions                                                                                                                                          | 169                 |
|                                                                                                 |         | (c) Explain how missing data were addressed                                                                                                                                                                  | NA                  |
|                                                                                                 |         | (d) If applicable, explain how loss to follow-up was addressed                                                                                                                                               | 162                 |
|                                                                                                 |         | (e) Describe any sensitivity analyses                                                                                                                                                                        | NA                  |
| <b>Results</b>                                                                                  |         |                                                                                                                                                                                                              |                     |
| Participants                                                                                    | 13*     | (a) Report numbers of individuals at each stage of study—eg numbers potentially eligible, examined for eligibility, confirmed eligible, included in the study, completing follow-up, and analysed            | 183                 |
|                                                                                                 |         | (b) Give reasons for non-participation at each stage                                                                                                                                                         | NA                  |
|                                                                                                 |         | (c) Consider use of a flow diagram                                                                                                                                                                           | NA                  |
| Descriptive data                                                                                | 14*     | (a) Give characteristics of study participants (eg demographic, clinical, social) and information on exposures and potential confounders                                                                     | 183-192             |
|                                                                                                 |         | (b) Indicate number of participants with missing data for each variable of interest                                                                                                                          | NA                  |
|                                                                                                 |         | (c) Summarise follow-up time (eg, average and total amount)                                                                                                                                                  | Fig 1, 190          |
| Outcome data                                                                                    | 15*     | Report numbers of outcome events or summary measures over time                                                                                                                                               |                     |
| Main results                                                                                    | 16      | (a) Give unadjusted estimates and, if applicable, confounder-adjusted estimates and their precision (eg, 95% confidence interval). Make clear which confounders were adjusted for and why they were included | Tbl 2, 4<br>199-227 |
|                                                                                                 |         | (b) Report category boundaries when continuous variables were categorized                                                                                                                                    | Tbl4                |
|                                                                                                 |         | (c) If relevant, consider translating estimates of relative risk into absolute risk for a meaningful time period                                                                                             | Tbl3, 259           |

|    |                          |    |                                                                                        |         |
|----|--------------------------|----|----------------------------------------------------------------------------------------|---------|
| 1  | Other analyses           | 17 | Report other analyses done—eg analyses of subgroups and interactions, and              | 205     |
| 2  |                          |    | sensitivity analyses                                                                   |         |
| 3  | <hr/>                    |    |                                                                                        |         |
| 4  | <b>Discussion</b>        |    |                                                                                        |         |
| 5  | Key results              | 18 | Summarise key results with reference to study objectives                               | 231-237 |
| 6  | Limitations              | 19 | Discuss limitations of the study, taking into account sources of potential bias or     | 273-278 |
| 7  |                          |    | imprecision. Discuss both direction and magnitude of any potential bias                |         |
| 8  | <hr/>                    |    |                                                                                        |         |
| 9  | Interpretation           | 20 | Give a cautious overall interpretation of results considering objectives, limitations, | 238-270 |
| 10 |                          |    | multiplicity of analyses, results from similar studies, and other relevant evidence    |         |
| 11 | <hr/>                    |    |                                                                                        |         |
| 12 | Generalisability         | 21 | Discuss the generalisability (external validity) of the study results                  | 278     |
| 13 | <hr/>                    |    |                                                                                        |         |
| 14 | <b>Other information</b> |    |                                                                                        |         |
| 15 | Funding                  | 22 | Give the source of funding and the role of the funders for the present study and, if   | 30      |
| 16 |                          |    | applicable, for the original study on which the present article is based               |         |
| 17 | <hr/>                    |    |                                                                                        |         |

18 \*Give information separately for exposed and unexposed groups.

19  
20  
21 **Note:** An Explanation and Elaboration article discusses each checklist item and gives methodological background and  
22 published examples of transparent reporting. The STROBE checklist is best used in conjunction with this article (freely  
23 available on the Web sites of PLoS Medicine at <http://www.plosmedicine.org/>, Annals of Internal Medicine at  
24 <http://www.annals.org/>, and Epidemiology at <http://www.epidem.com/>). Information on the STROBE Initiative is  
25 available at <http://www.strobe-statement.org>.  
26  
27  
28  
29  
30  
31  
32  
33  
34  
35  
36  
37  
38  
39  
40  
41  
42  
43  
44  
45  
46  
47  
48  
49  
50  
51  
52  
53  
54  
55  
56  
57  
58  
59  
60
